# Supplementary material for: Nitric oxide diffusion through cystic fibrosis-relevant media and lung tissue
Source: Royal Society of Chemistry journal article supplement (doi:10.1039/c9ra07367a), 2019-01-01
Supplement: c9ra07367a1.pdf [file c9ra07367a1.pdf]

## Supporting Information

### **Nitric oxide diffusion through cystic fibrosis-relevant media and lung tissue**

*Jackson R. Hall, Sara E. Maloney, Haibao Jin, James B. Taylor, and Mark H. Schoenfish\**

<sup>a</sup>Department of Chemistry, The University of North Carolina at Chapel Hill, Chapel Hill, North Carolina, 27599

\*To whom correspondence should be addressed: [schoenfish@unc.edu](mailto:schoenfish@unc.edu)

#### Table of Contents:

Figure S1: Image of assembled glass diffusion cell

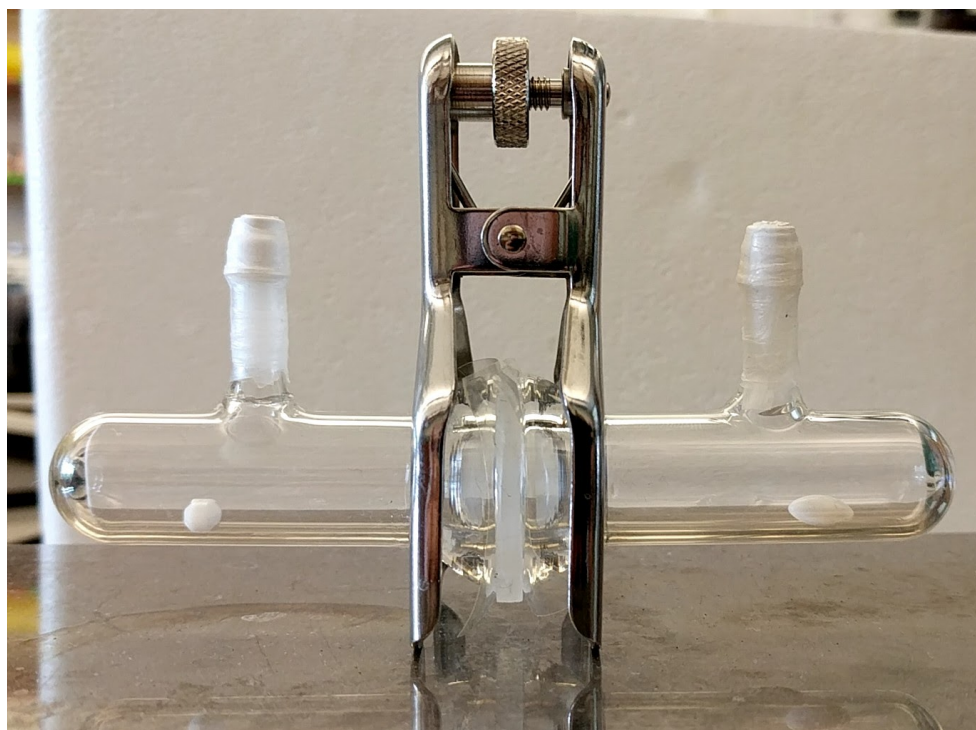

**Figure S1.** Picture of the assembled side-by-side glass diffusion cell.
